# Supplementary material for: High Open‐Circuit Voltage Cs2AgBiBr6 Carbon‐Based Perovskite Solar Cells via Green Processing of Ultrasonic Spray‐Coated Carbon Electrodes from Waste Tire Sources
Source: PubMed Central journal article supplement — ChemSusChem. 2022 Oct 1;15(22):e202201590. doi: 10.1002/cssc.202201590 (PMC9828808; doi:10.1002/cssc.202201590), 2022-10-01
Supplement: CSSC-15-0-s001.pdf [file CSSC-15-0-s001.pdf]

# ChemSusChem

## Supporting Information

### **High Open-Circuit Voltage Cs<sub>2</sub>AgBiBr<sub>6</sub> Carbon-Based Perovskite Solar Cells via Green Processing of Ultrasonic Spray-Coated Carbon Electrodes from Waste Tire Sources**

Fabian Schmitz<sup>+</sup>, Nicolò Lago<sup>+</sup>, Lucia Fagiolari, Julian Burkhart, Andrea Cester, Andrea Polo, Mirko Prato, Gaudenzio Meneghesso, Silvia Gross, Federico Bella,\* Francesco Lamberti,\* and Teresa Gatti\* This publication is part of a Special Collection highlighting "The Latest Research from our Board Members". Please visit the Special Collection at [.© 2022 The Authors.](#) ChemSusChem published by Wiley-VCH GmbH. This is an open access article under the terms of the Creative Commons Attribution Non-Commercial License, which permits use, distribution and reproduction in any medium, provided the original work is properly cited and is not used for commercial purposes.

## Table of Contents

- Raman spectrum, thermogram and P-XRD pattern of the carbon powder prepared from waste tire sources (Figure S1)
- Scheme of the CE US deposition pattern on top of the FTO/TiO<sub>2</sub>/Cs<sub>2</sub>AgBiBr<sub>6</sub> architecture (Figure S2)
- GIXRD pattern of the FTO/TiO<sub>2</sub>/Cs<sub>2</sub>AgBiBr<sub>6</sub>/CE C-PSC (Figure S3)
- SEM images of the FTO/TiO<sub>2</sub>/Cs<sub>2</sub>AgBiBr<sub>6</sub> architecture (Figure S4)
- DLS spectrum of the carbon ink in iPA used for US spray coating of the CE (Figure S5)
- Argon physisorption and calculated BET surface area for the carbon black powder (Figure S6)
- UV-visible absorption spectrum of the FTO/TiO<sub>2</sub>/Cs<sub>2</sub>AgBiBr<sub>6</sub> architecture (Figure S7)
- EQE spectra of a FTO/TiO<sub>2</sub>/Cs<sub>2</sub>AgBiBr<sub>6</sub>/CE C-PSC before and after application of FTO on top of the CE (Figure S8)
- SEM cross-section images of C-PSCs based on screen-printed CEs (Figure S9)
- J-V characteristics for C-PSCs based on screen-printed CEs (Figure S10)

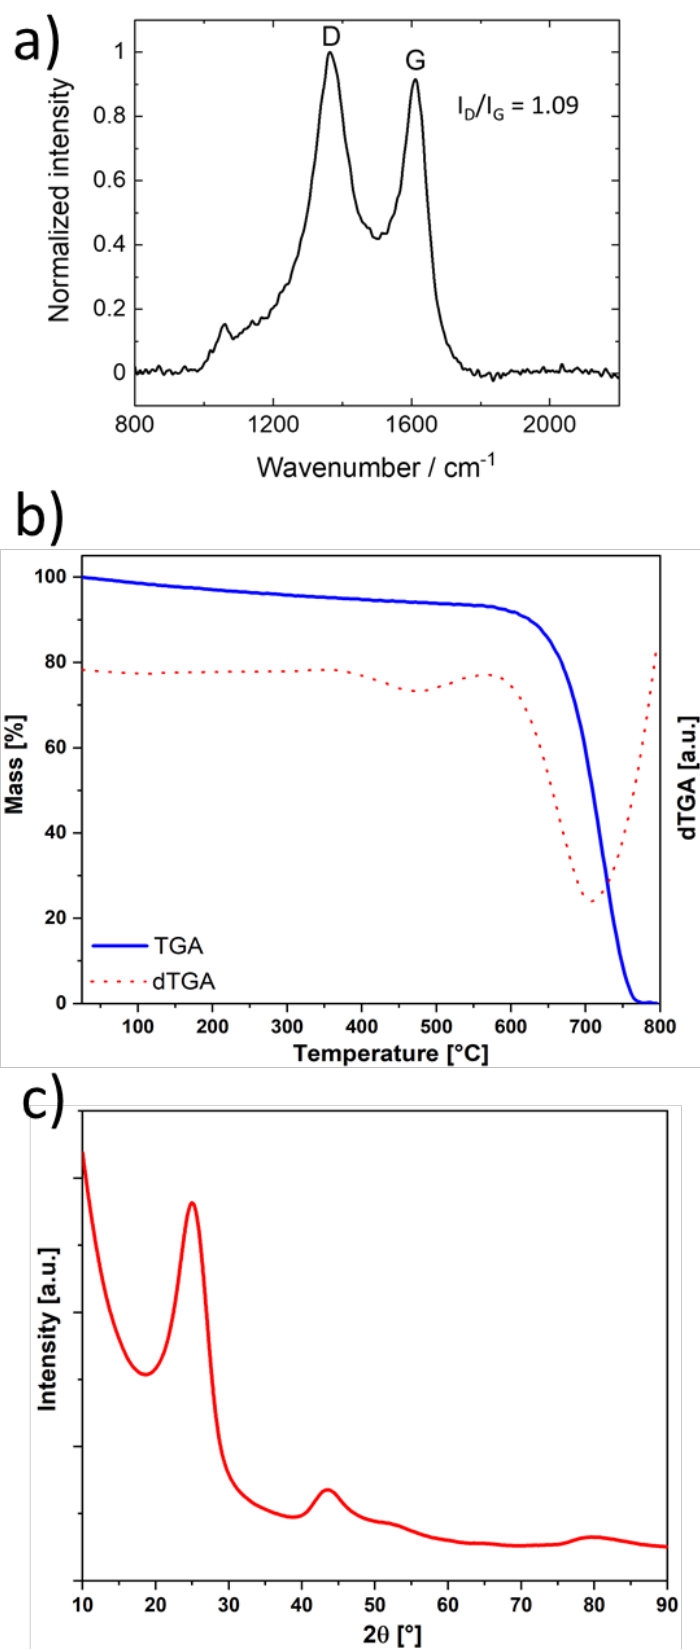

**Figure S1.** a) Raman plot, b) TGA thermogram and c) P-XRD trace for tire-derived carbon black.

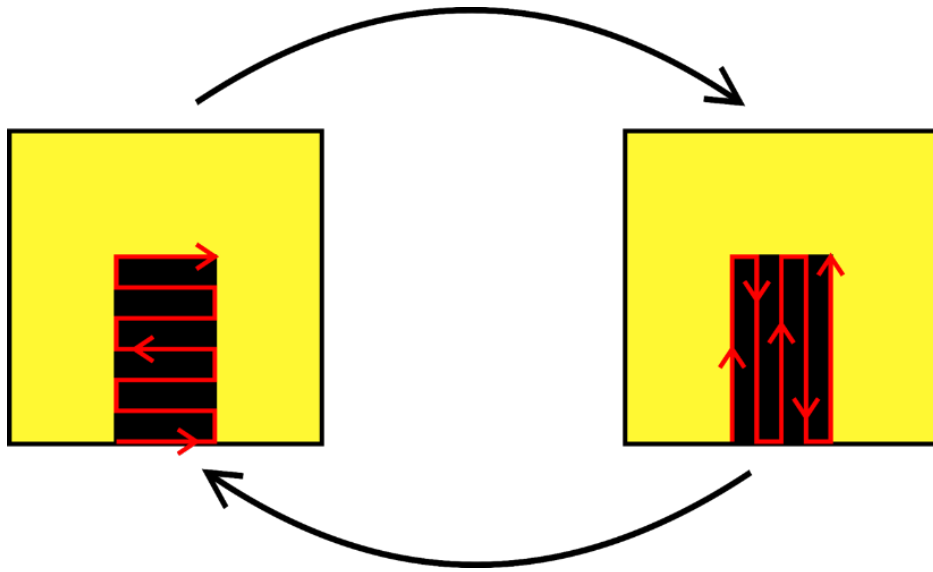

**Figure S2.** CE US deposition pattern on top of the FTO/TiO<sub>2</sub>/Cs<sub>2</sub>AgBiBr<sub>6</sub> direct PSC architecture.

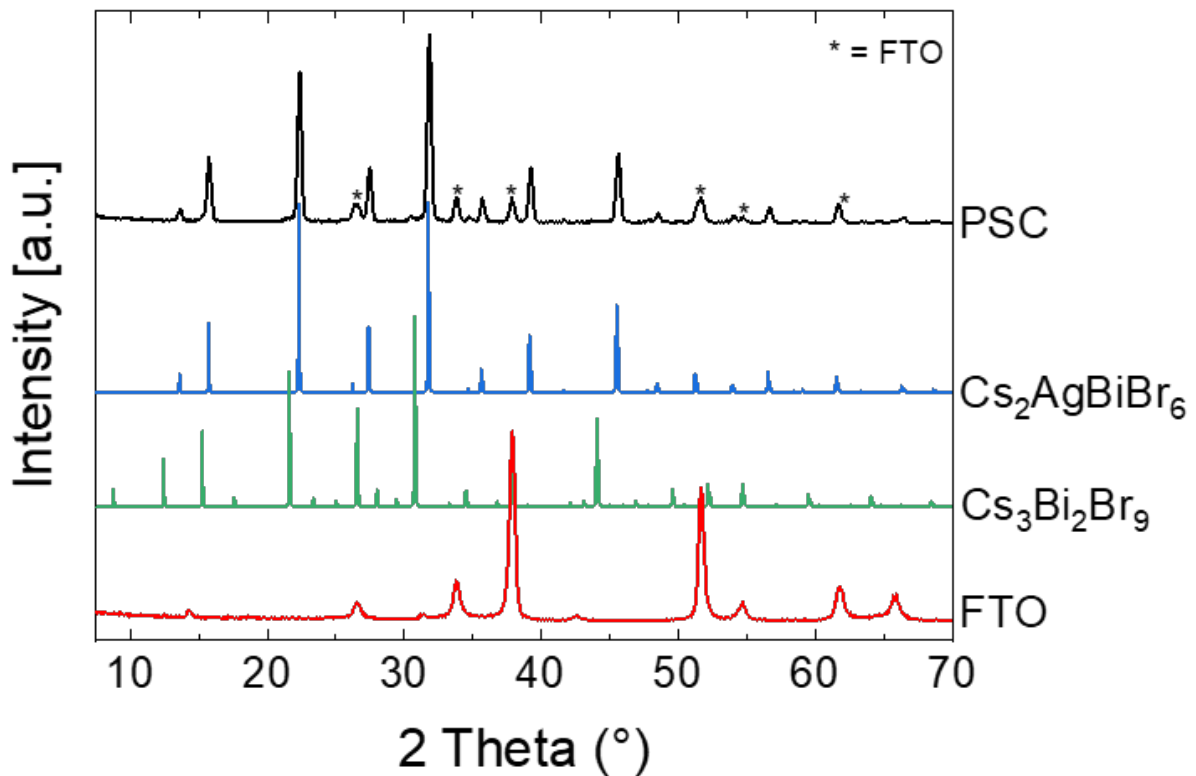

**Figure S3.** GIXRD pattern of the FTO/TiO<sub>2</sub>/Cs<sub>2</sub>AgBiBr<sub>6</sub>/CE C-PSC. The measured GIXRD pattern for the FTO substrate and the theoretical patterns of the Cs<sub>2</sub>AgBiBr<sub>6</sub> double perovskite and of the typical side-phase Cs<sub>3</sub>Bi<sub>2</sub>Br<sub>9</sub> are also reported for the sake of comparison, showing that no side phase is present (or at least detectable) in the solar cell architecture.

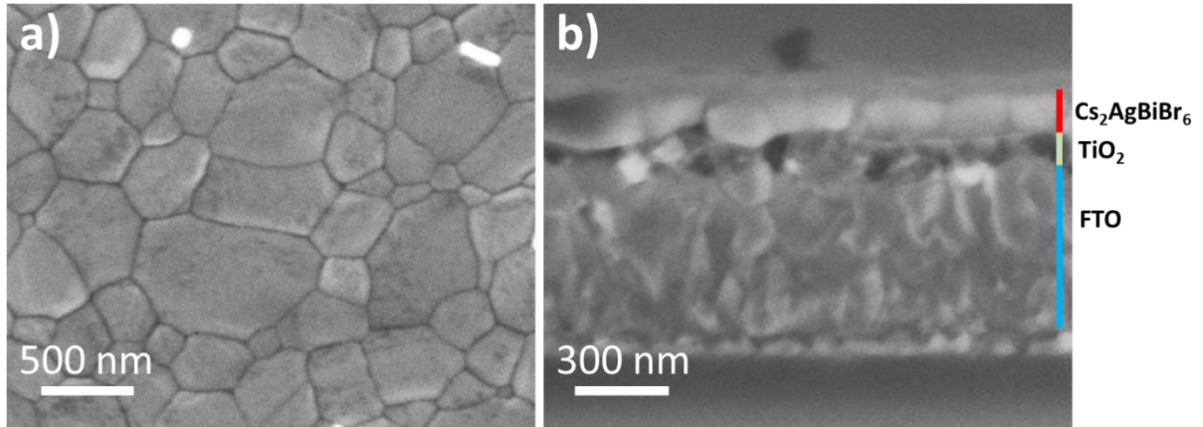

**Figure S4.** Top-view a) and cross-section b) SEM images of the  $\text{Cs}_2\text{AgBiBr}_6$  double perovskite thin film processed on top of a FTO/compact  $\text{TiO}_2$  substrate.

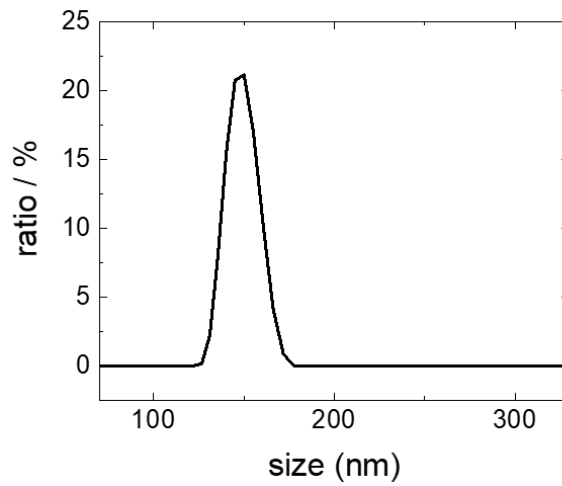

**Figure S5.** DLS spectrum of the 0.1 mg/mL carbon ink in iPA prepared after tip-sonication and used for US spray coating.

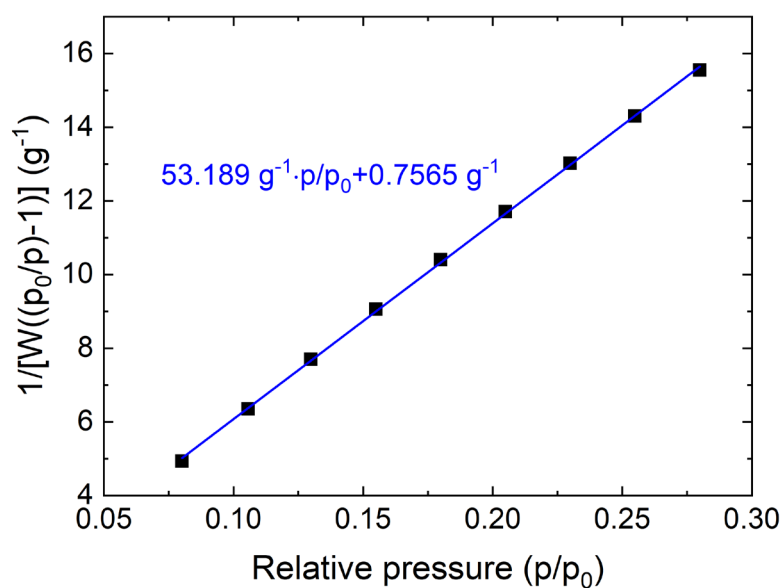

**Figure S6.** Argon physisorption measurements (black dots) and BET fit (blue) to calculate the specific surface area of the carbon black powder.

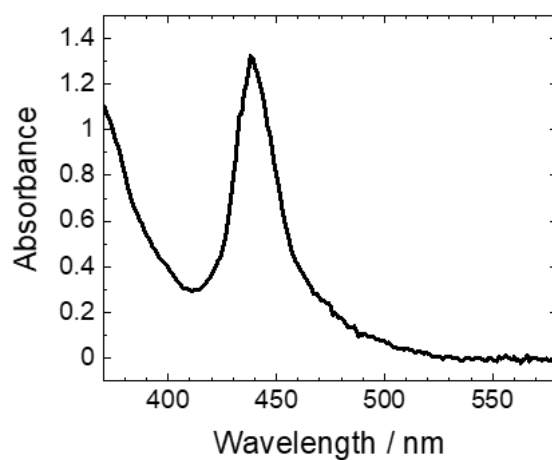

**Figure S7.** UV-visible absorption spectrum of the FTO/TiO<sub>2</sub>/Cs<sub>2</sub>AgBiBr<sub>6</sub> junction.

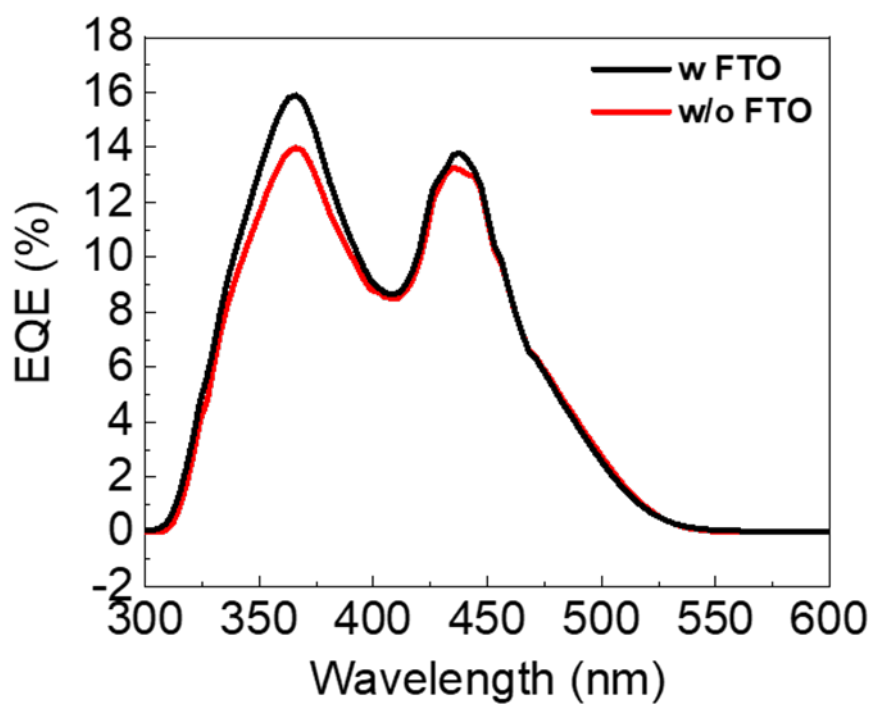

**Figure S8.** EQE spectra of a FTO/TiO<sub>2</sub>/Cs<sub>2</sub>AgBiBr<sub>6</sub>/CE C-PSC with and without application of a clean FTO electrode on top of the CE.

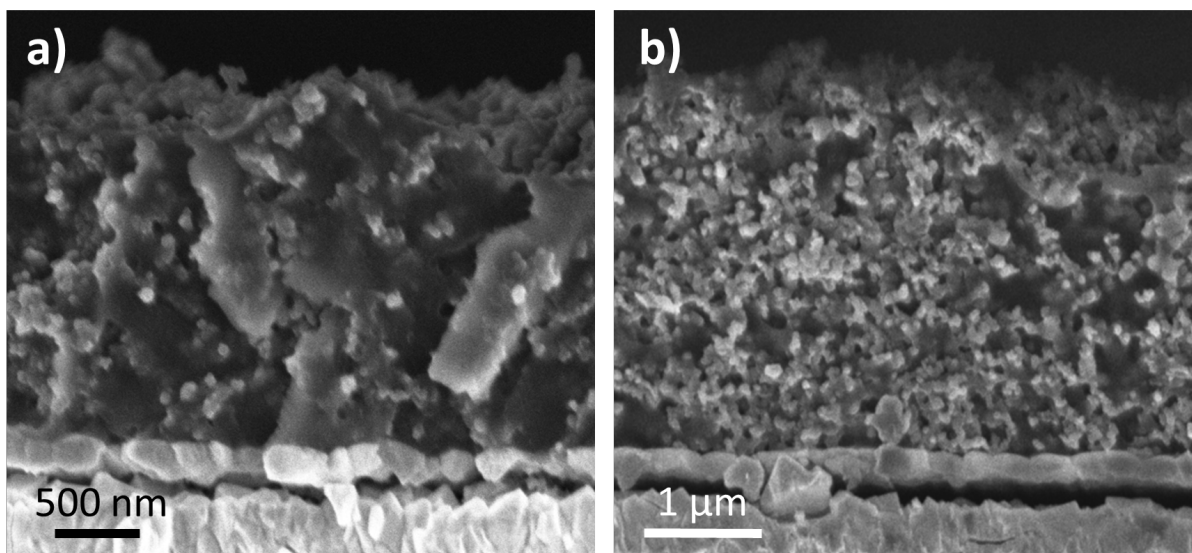

**Figure S9.** SEM cross-section images of C-PSCs based on screen-printed CEs prepared from a) iPA/PVP/carbon paste and b) CB/PMMA/carbon paste.

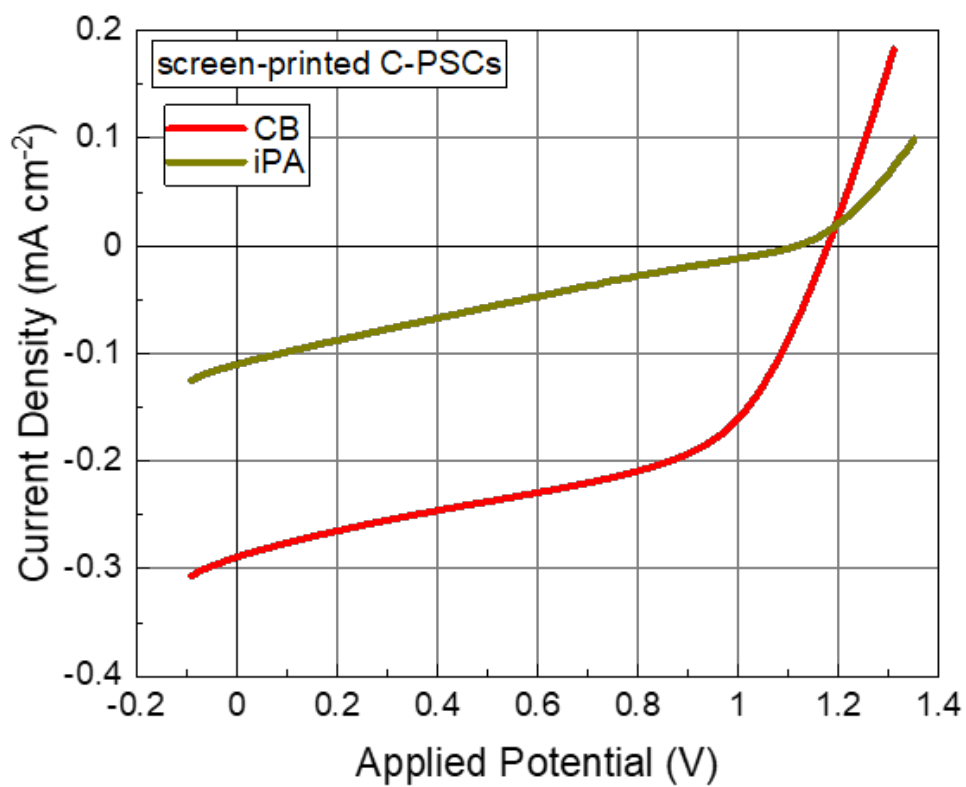

**Figure S10.** Prototypical J-V characteristics for C-PSCs based on screen-printed CEs prepared from iPA and CB pastes.
